# Supplementary material for: Functionalized hydrazide macrocycle ion channels showing pH-sensitive ion selectivities
Source: Royal Society of Chemistry journal article supplement (doi:10.1039/c6cc08943g), 2016-12-12
Supplement: c6cc08943g1.pdf [file c6cc08943g1.pdf]

# **Functionalized hydrazide macrocycle ion channels showing pH-sensitive ion selectivities**

Pengyang Xin,\* Si Tan, Yaodong Wang, Yonghui Sun, Yan Wang, Yuqing Xu, and  
Chang-Po Chen\*

School of Chemistry and Chemical Engineering, Henan Normal University,  
Xinxiang, Henan 453007, China.

\*To whom correspondence should be addressed: pyxin27@163.com;  
changpochen@yahoo.com.

## **Contents**

|                                                                |     |
|----------------------------------------------------------------|-----|
| 1. General                                                     | S2  |
| 2. Synthetic procedures and characterization data for <b>3</b> | S2  |
| 3. Procedures for proton transport experiments                 | S10 |
| 4. Procedures for chloride transport experiments               | S11 |
| 5. Procedures for patch clamp experiments                      | S12 |
| 6. References                                                  | S15 |

## 1. General:

Egg yolk L- $\alpha$ -phosphatidylcholine was obtained from Sigma-Aldrich as chloroform solution (100 mg/mL). 1,2-diphytanoyl-*sn*-glycero-3-phosphocholine (diPhyPC) was obtained from Avanti Polar Lipids as chloroform solution (10 mg/mL).  $^1\text{H}$  and  $^{13}\text{C}$  NMR spectra were recorded on commercial instruments (400 MHz) at 298 K. Chemical shifts were referenced to solvent residue. Mass spectra were recorded with Bruker MicroTOF II spectrometer by using positive or negative mode. The peptides were synthesized according to the classical liquid phase synthesis method by employing EDCI as condensation reagent.

## 2. Synthetic procedures and characterization data:

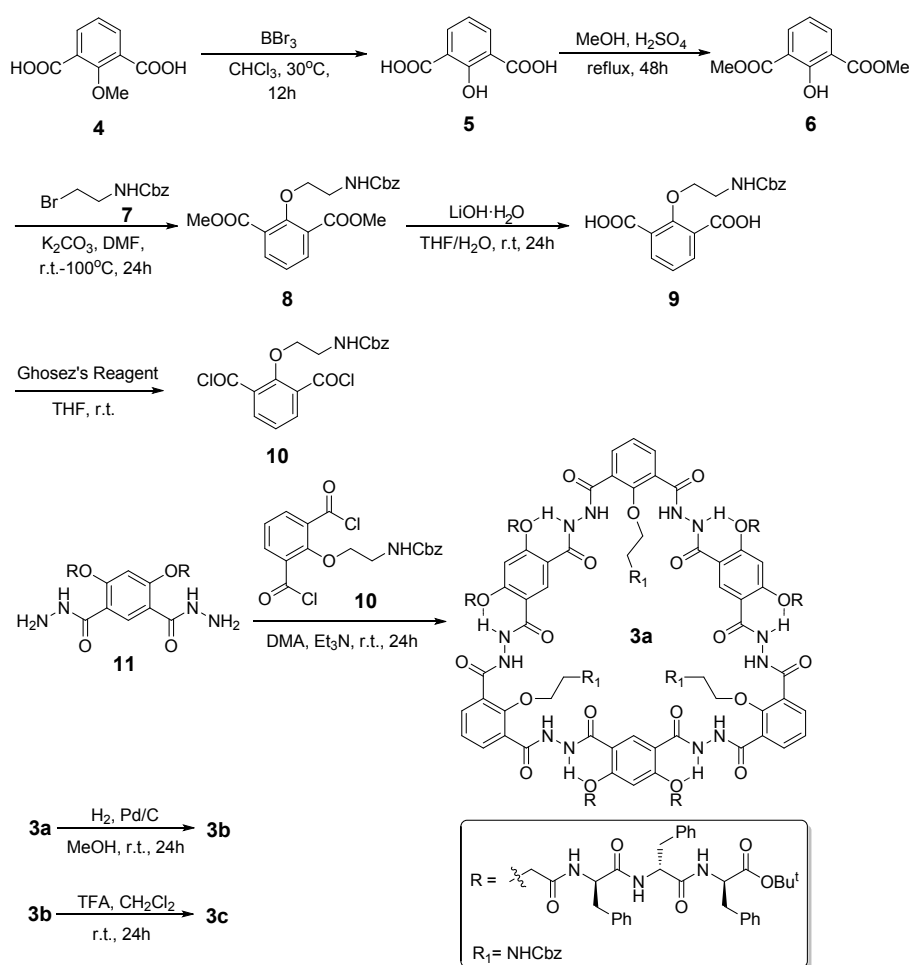

**Compound 5.** To a solution of 4 (2.0 g, 10.2 mmol) in dry dichloromethane (DCM) (50 mL) was added  $\text{BBr}_3$  (15.9 g, 63.5 mmol) dropwise under nitrogen at  $0^\circ\text{C}$ . After addition, the mixture was stirred at that temperature for several minutes and then warm to  $30^\circ\text{C}$  for additional 12h. Then the mixture was added dropwise to the cold water until no gas was liberated. The reaction mixture was then filtrated. The precipitation was collected and washed with water to yield 5 as a white solid.

Yield: 50%.  $^1\text{H}$  NMR (400 MHz,  $\text{DMSO}-d_6$ )  $\delta$  12.60 (br, 3H), 7.95 (d,  $J = 8$  Hz,

2H), 6.92 (t,  $J = 8$  Hz, 1H). HRMS: Calcd for  $C_8H_5O_5$   $[M-H]^-$ : 181.0137. Found: 181.0135.

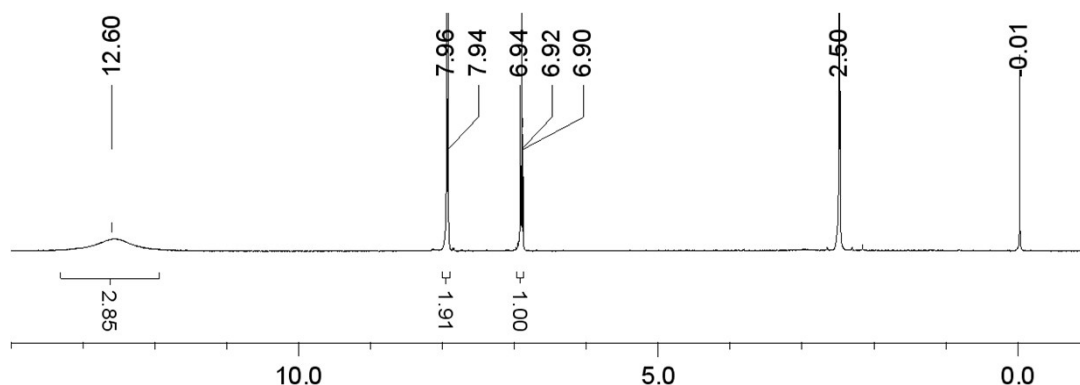

**Figure S1.**  $^1H$  NMR spectrum of **5** in  $DMSO-d_6$ .

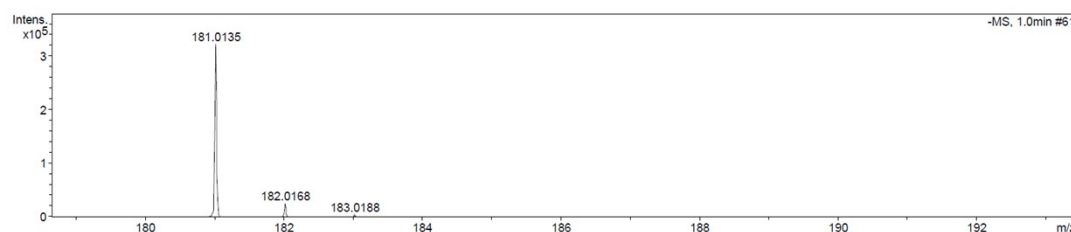

**Figure S2.** HR-MS of **5**.

**Compound 6.** To a solution of **5** (1.0 g, 5.5 mmol) in dry MeOH (25 mL) was added concentrated  $H_2SO_4$  (1.5 mL) dropwise under nitrogen at  $0^\circ C$ . After addition, the reaction mixture was allowed to warm to room temperature and then heated under reflux for additional 48 h. The mixture was concentrated under reduced pressure. The residue was then dissolved in ethyl acetate and washed with saturated  $NaHCO_3$  solution and brine, dried over anhydrous  $Na_2SO_4$ . After removing of the solvent, the product was obtained as a white solid.

Yield: 88%.  $^1H$  NMR (400 MHz,  $CDCl_3$ ):  $\delta$  11.82 (s, 1H), 8.05 (d,  $J = 8$  Hz, 2H), 6.937 (t,  $J = 8$  Hz, 1H), 3.95 (s, 6H).  $^{13}C$  NMR (100 MHz,  $CDCl_3$ ):  $\delta$  168.0, 161.4, 136.2, 118.3, 116.4, 52.4, 29.6. HRMS: Calcd for  $C_{10}H_{11}O_5$   $[M+H]^+$ : 211.0606. Found: 211.0618.

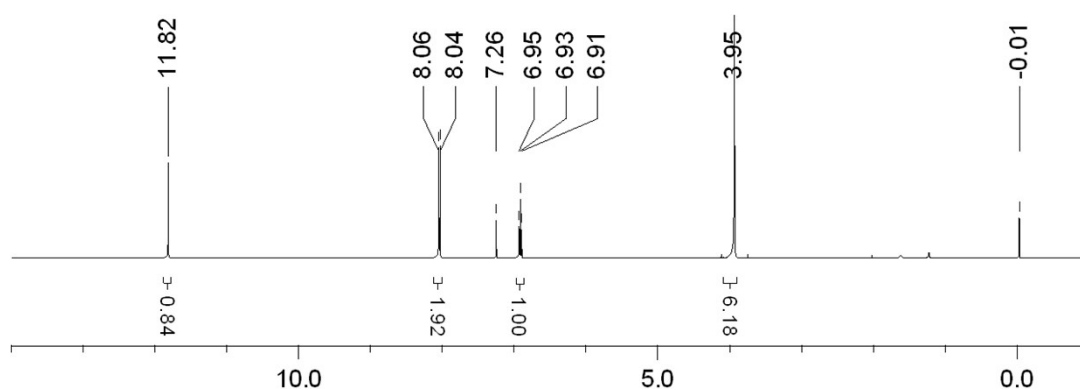

**Figure S3.**  $^1\text{H}$  NMR spectrum of **6** in  $\text{CDCl}_3$ .

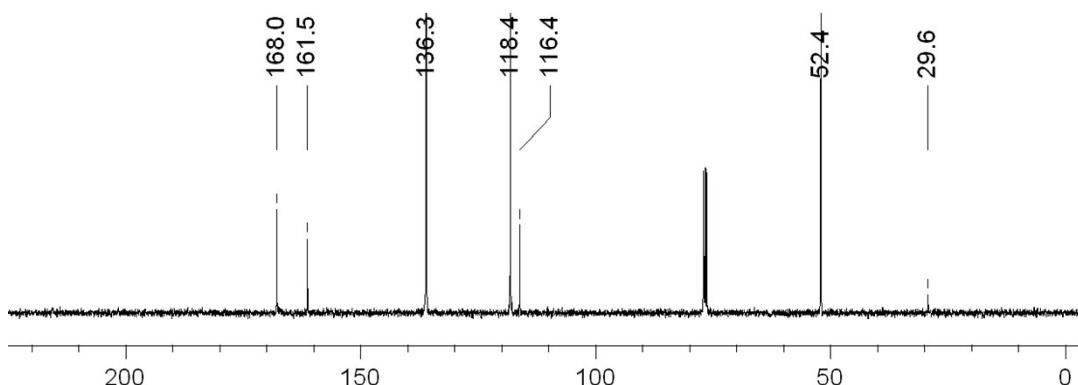

**Figure S4.**  $^{13}\text{C}$  NMR spectrum of **6** in  $\text{CDCl}_3$ .

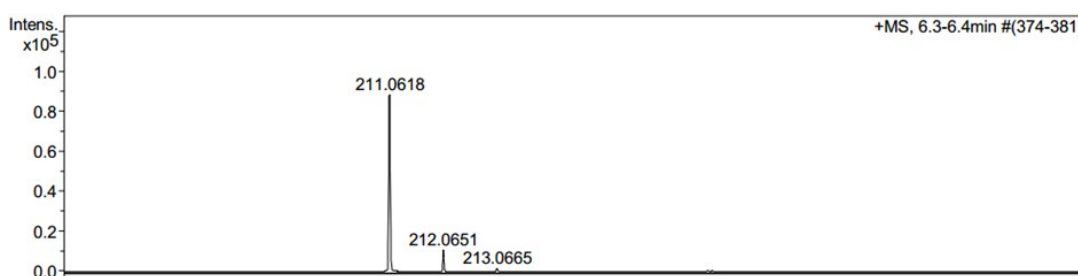

**Figure S5.** HR-MS of **6**.

**Compound 8.** The solution of **6** (0.5 g, 2.4 mmol),  $\text{K}_2\text{CO}_3$  (0.83g, 6mmol) in anhydrous DMF (30 mL) was stirred at room temperature for 1 h. Then the compound **7** (0.74 g, 2.9 mmol) was added to the mixture. The reaction mixture was stirred at room temperature for 1h. The mixture was then stirred at 100 °C for additional 24h. The mixture was concentrated under reduced pressure. The residue was dissolved in ethyl acetate. The organic solution was then washed with water, dried over anhydrous  $\text{Na}_2\text{SO}_4$ . After removing of the solvent, the crude product was purified by column chromatography on silica gel to yield **8** as colorless oil.

Yield: 43%.  $^1\text{H}$  NMR (400 MHz,  $\text{CDCl}_3$ )  $\delta$  7.96 (d,  $J$  = 8 Hz, 2H), 7.39-7.30 (m, 5H), 7.21 (t,  $J$  = 8 Hz, 1H), 6.08 (br, 1H), 5.14 (s, 2H), 4.14 (t,  $J$  = 8 Hz, 2H), 3.89 (s, 6H), 3.60 (t,  $J$  = 8 Hz, 2H).  $^{13}\text{C}$  NMR (100 MHz,  $\text{CDCl}_3$ ):  $\delta$  165.8, 135.3, 128.4, 127.9, 125.9, 123.5, 74.8, 66.4, 52.4, 41.4. HRMS: Calcd for  $\text{C}_{20}\text{H}_{22}\text{NO}_7$   $[\text{M}+\text{H}]^+$ : 388.1396. Found: 388.1397.

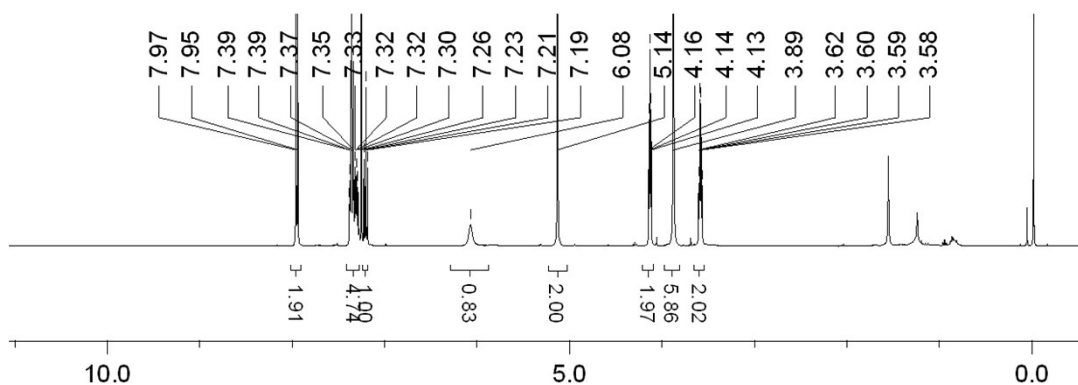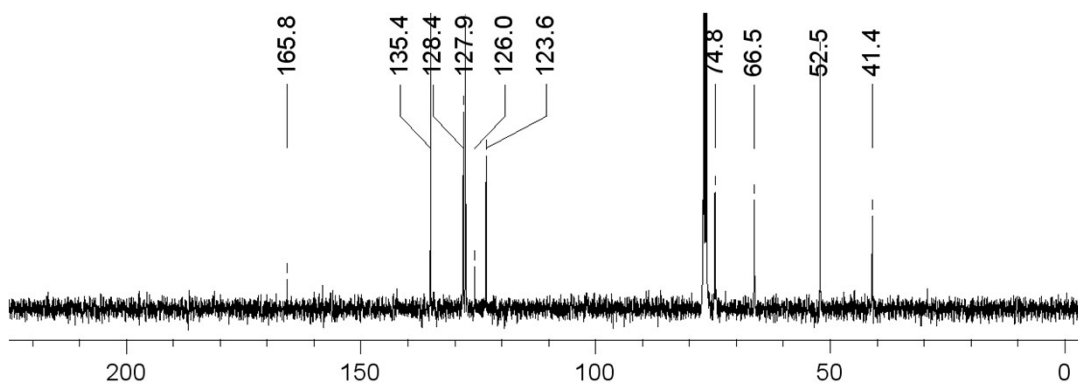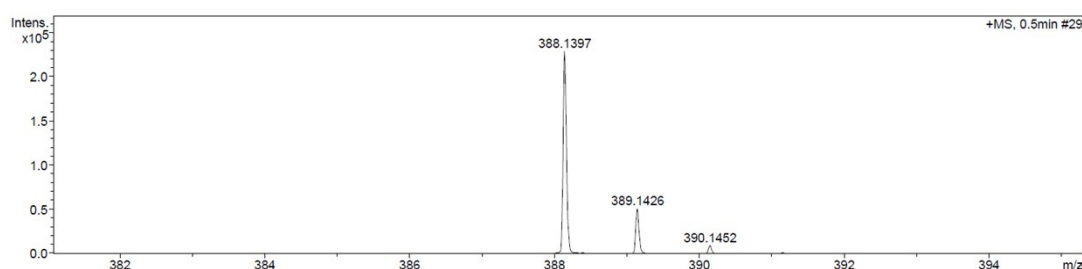

**Figure S8.** HR-MS of **8**.

**Compound 9.** To a solution of **8** (0.49 g, 1.26 mmol) in THF/H<sub>2</sub>O (24/8 mL) was added LiOH•H<sub>2</sub>O (0.43 g, 10.1 mmol). The mixture was stirred at room temperature for 24 h and then the solvent was removed under reduced pressure. The residue was dissolved in water and acidified with aqueous HCl solution (2%). The mixture was then extracted with ethyl acetate. The organic solution dried over anhydrous Na<sub>2</sub>SO<sub>4</sub>. After removing of the solvent, the product was obtained as a white solid.

Yield: 80%. <sup>1</sup>H NMR (400 MHz, DMSO-*d*<sub>6</sub>) δ 13.19 (br, 2H), 7.84 (d, *J* = 8 Hz, 2H), 7.38-7.21 (m, 7H), 5.02 (s, 2H), 4.01 (t, *J* = 6 Hz, 2H), 3.36 (q, *J* = 8 Hz, 2H). <sup>13</sup>C NMR (100 MHz, DMSO-*d*<sub>6</sub>): δ 167.4, 157.0, 156.5, 137.6, 134.2, 128.8, 128.2, 128.1, 127.8, 124.1, 74.2, 65.8. HRMS: Calcd for C<sub>18</sub>H<sub>18</sub>NO<sub>7</sub> [M+H]<sup>+</sup>: 360.1083. Found: 360.1078.

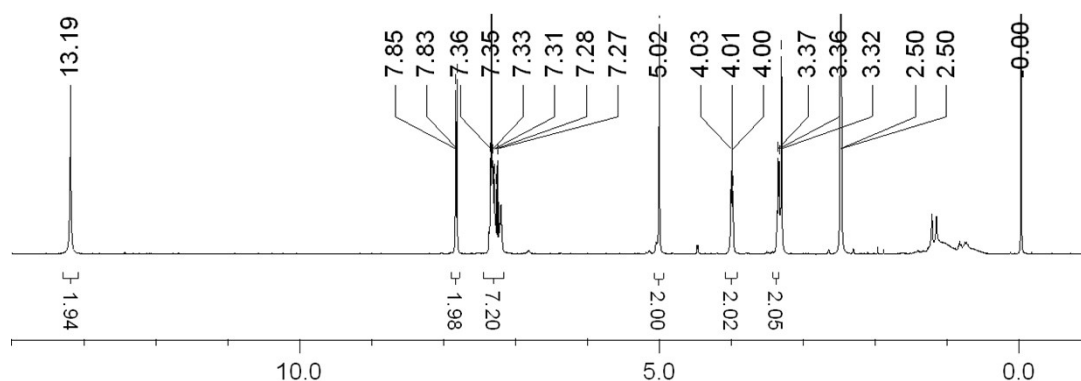

**Figure S9.**  $^1\text{H}$  NMR spectrum of **9** in  $\text{DMSO-}d_6$ .

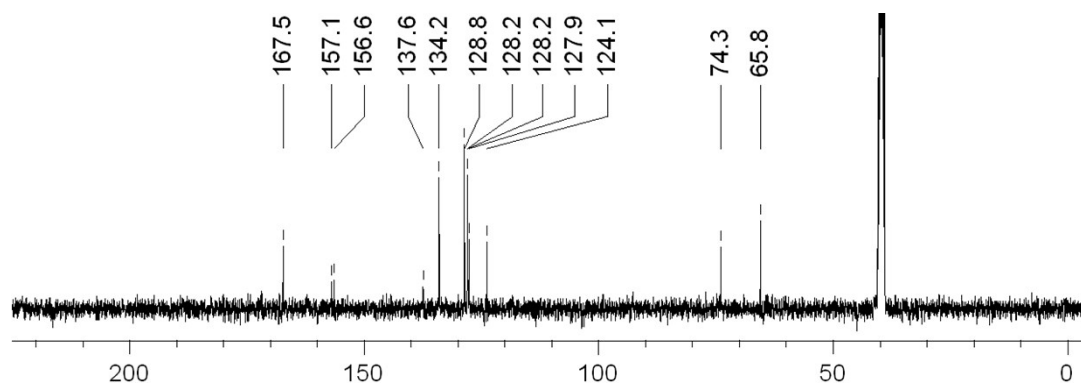

**Figure S10.**  $^{13}\text{C}$  NMR spectrum of **9** in  $\text{DMSO-}d_6$ .

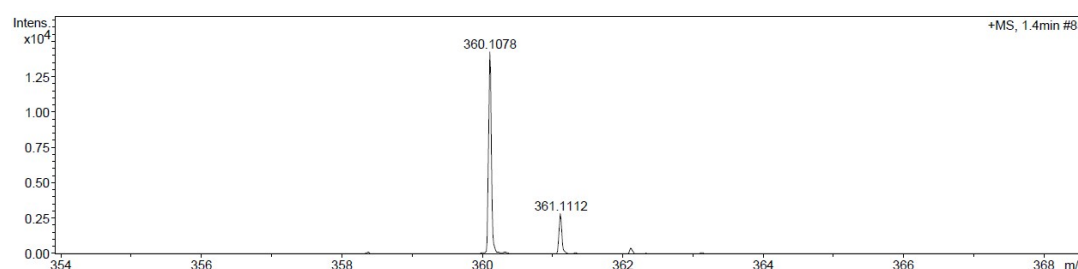

**Figure S11.** HR-MS of **9**.

**Compound 11.** This compound was synthesized from the procedure we have reported.<sup>1</sup>

**Compound 3a.** To a solution of **9** (0.12 g, 0.34 mmol) in anhydrous THF (25 mL) was added Ghosez's reagent (0.36 mL, 2.7 mmol). The mixture was stirred at room temperature for 12 h. The solvent was removed under reduced pressure to give the corresponding chloride (**10**) which was then re-dissolved in anhydrous DMA (15 mL). To this mixture was added **11** (0.45 g, 0.34 mmol) and triethylamine (0.14 mL, 1 mmol). The mixture was then stirred at room temperature for 24 h and then concentrated under reduced pressure. The residue was purified by column chromatography on silica gel to yield **3a** as a light yellow solid.

Yield: 71%.  $^1\text{H}$  NMR (400 MHz,  $\text{DMSO-}d_6$ )  $\delta$  10.56-10.37 (m, 10H), 8.48-8.27 (m,

20H), 7.85-7.73 (m, 6H), 7.24-7.07 (m, 114H), 6.38-6.23 (m, 3H), 5.02-4.89 (m, 6H), 4.62-4.14 (m, 36H), 3.44 (br, 6H), 3.07-2.94 (m, 24H), 2.78-2.67 (m, 12H), 1.30 (s, 54H).  $^{13}\text{C}$  NMR (100 MHz, DMSO- $d_6$ ):  $\delta$  171.3, 170.8, 167.2, 165.6, 164.0, 159.6, 156.7, 138.0, 137.8, 137.5, 130.0, 129.6, 129.4, 128.6, 128.4, 128.0, 127.7, 126.9, 126.6, 124.3, 115.0, 81.1, 67.9, 65.6, 54.7, 54.1, 46.1, 38.2, 37.3, 27.9. HRMS: calcd for  $\text{C}_{276}\text{H}_{299}\text{N}_{35}\text{O}_{57} [\text{M}+2\text{NH}_4]^{2+}$ : 2508.5821, found: 2508.5823.

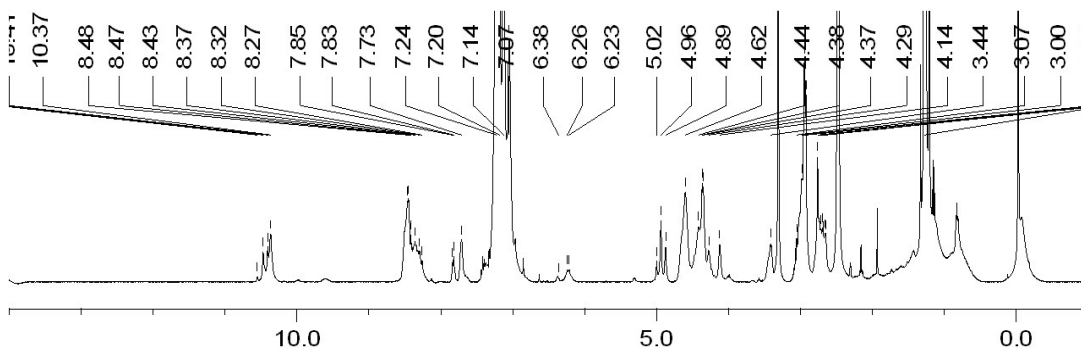

**Figure S12.**  $^1\text{H}$  NMR spectrum of **3a** in DMSO- $d_6$ .

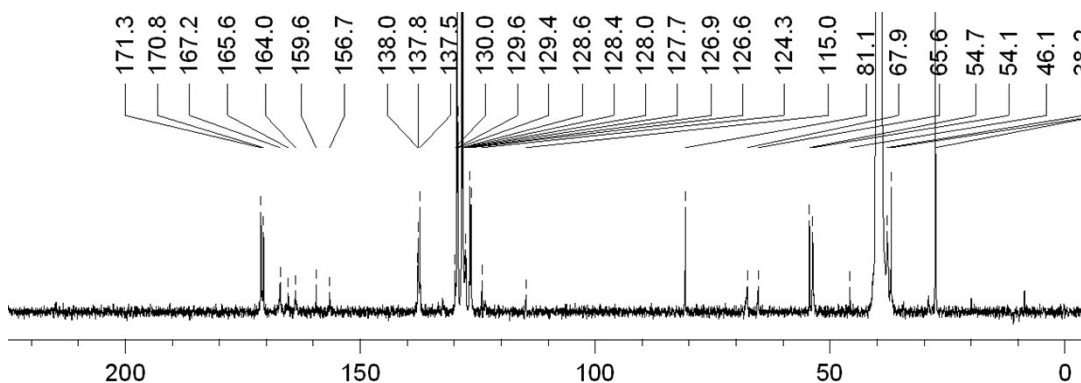

**Figure S13.**  $^{13}\text{C}$  NMR spectrum of **3a** in DMSO- $d_6$ .

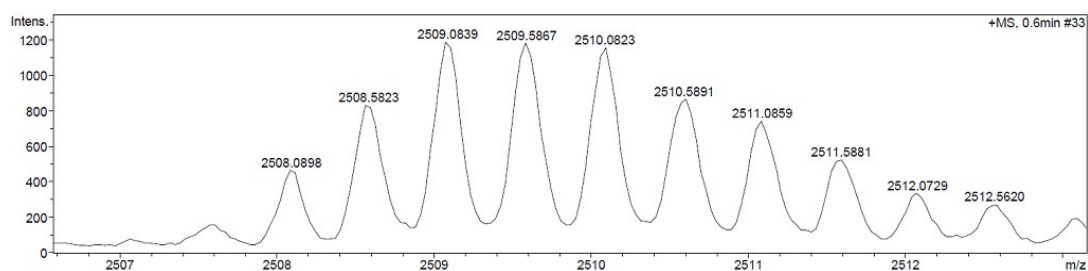

**Figure S14.** HR-MS of **3a**.

**Compound 3b.** To a solution of **3a** (0.2 g, 0.04 mmol) in MeOH (30 mL) was added Pd/C (10%, 0.24 g). The mixture was stirred at room temperature for 24 h under hydrogen. Then the mixture was filtrated and the residue was washed with MeOH. The organic solution was dried over anhydrous  $\text{Na}_2\text{SO}_4$ . After removing of the solvent, the crude product was washed with diethyl ether to yield **3b** as a yellow

solid.

Yield: 58%.  $^1\text{H}$  NMR (400 MHz, DMSO)  $\delta$  10.56-10.24 (m, 10H), 8.53-8.34 (m, 20H), 7.72-7.53 (m, 3H), 7.23-7.14 (m, 99H), 6.54-6.23 (br, 3H), 4.89 (br, 6H), 4.61-4.36 (m, 30H), 2.96 (br, 24H), 2.78-2.71 (m, 12H), 2.54 (s, 12H), 1.29 (s, 54H).  $^{13}\text{C}$  NMR (100 MHz, DMSO)  $\delta$  171.4, 171.4, 170.8, 138.1, 138.0, 137.9, 137.6, 129.7, 129.7, 129.6, 129.5, 128.6, 128.4, 127.0, 126.7, 81.1, 65.4, 54.8, 54.8, 54.2, 40.9, 38.2, 37.4, 28.0. HRMS: calcd for  $\text{C}_{252}\text{H}_{275}\text{N}_{33}\text{O}_{51}$   $[\text{M}+2\text{H}]^{2+}$ : 2290.5004, found: 2290.5003.

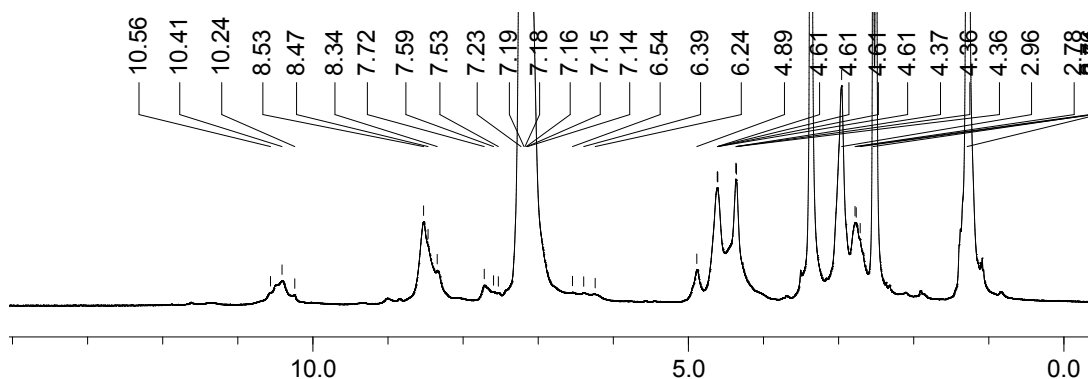

**Figure S15.**  $^1\text{H}$  NMR spectrum of **3b** in DMSO- $d_6$ .

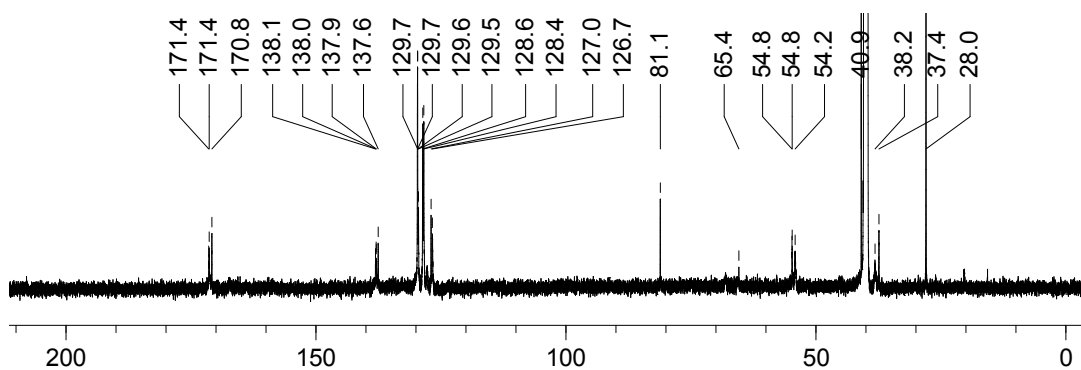

**Figure S16.**  $^{13}\text{C}$  NMR spectrum of **3b** in DMSO- $d_6$ .

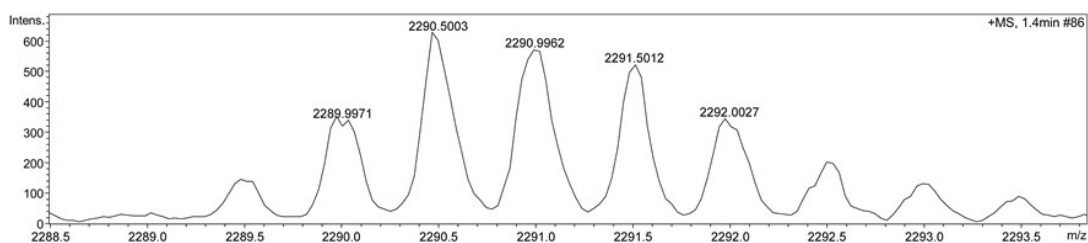

**Figure S17.** HR-MS of **3b**.

**Compound 3c.** To a solution of compound **3b** (70 mg, 0.015 mmol) in dichloromethane (10 mL) was added trifluoroacetic acid (1.0 mL). The mixture was stirred at room temperature for 24 h and then concentrated under reduced pressure.



The crude product was washed with diethyl ether and then recrystallized from ethanol to yield compound **3c** as a light yellow solid.

Yield: 82%.  $^1\text{H}$  NMR (400 MHz,  $\text{DMSO-}d_6$ )  $\delta$  10.58-10.41 (m, 6H), 8.99-8.83 (m, 4H), 8.53-8.26 (m, 20H), 7.72 (br, 3H), 7.23-7.14 (m, 99H), 6.54 (br, 2H), 6.23 (br, 1H), 4.95-4.89 (br, 4H), 4.63-4.31 (m, 32H), 3.06-2.94 (br, 24H), 2.79-2.67 (m, 12H).  $^{13}\text{C}$  NMR (100 MHz,  $\text{DMSO-}d_6$ )  $\delta$  173.2, 171.3, 171.0, 170.8, 170.4, 170.1, 167.2, 161.8, 161.7, 159.2, 158.2, 156.8, 138.5, 138.4, 138.1, 138.0, 137.9, 137.8, 137.5, 129.7, 129.6, 129.5, 129.5, 129.4, 128.7, 128.6, 128.5, 128.4, 128.3, 126.9, 126.7, 126.6, 106.8, 81.1, 68.3, 68.0, 65.7, 54.7, 54.2, 54.1, 54.0, 42.8, 38.0, 37.8, 37.2, 27.9, 26.0, 20.4, 20.3. HRMS: calcd for  $\text{C}_{228}\text{H}_{223}\text{N}_{33}\text{O}_{51}$   $[\text{M}-2\text{H}]^{2-}$ : 2120.2969, found: 2120.2968.

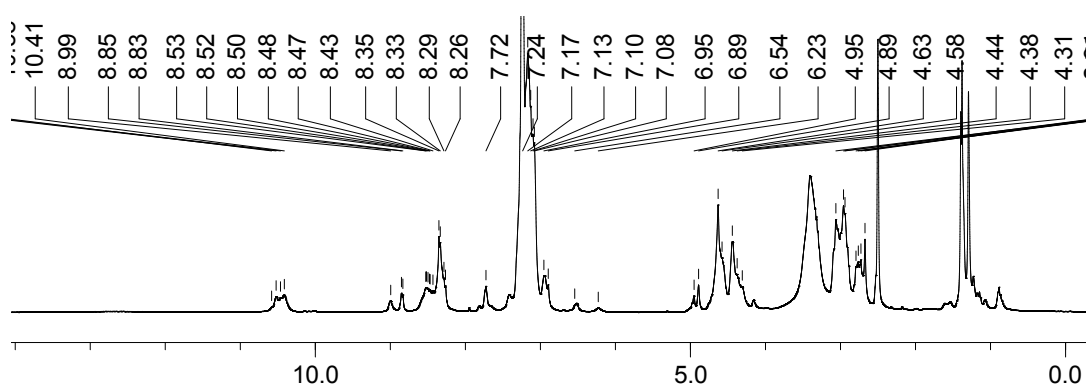

**Figure S18.**  $^1\text{H}$  NMR spectrum of **3c** in  $\text{DMSO-}d_6$ .

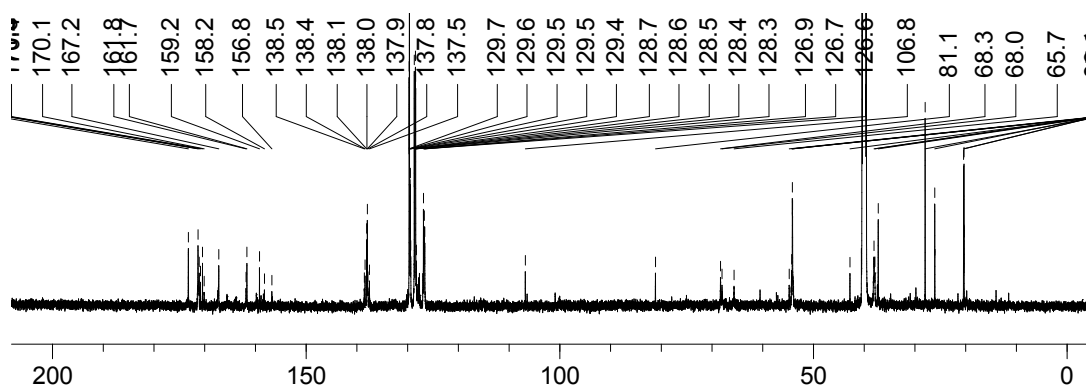

**Figure S19.**  $^{13}\text{C}$  NMR spectrum of **3c** in  $\text{DMSO-}d_6$ .

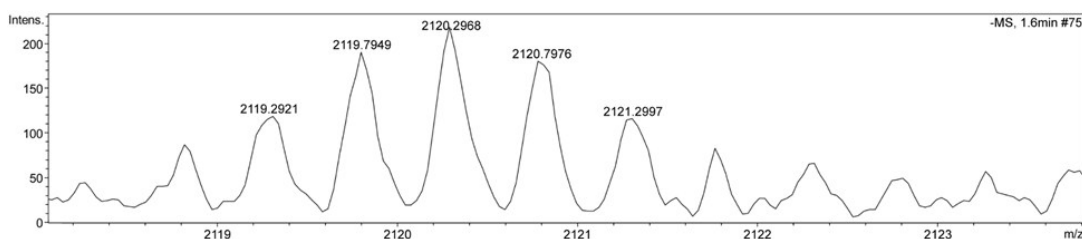

**Figure S20.** HR-MS of **3c**.

### 3. Procedures for proton transport experiments:<sup>2</sup>

**Preparation of HPTS containing large unilamellar vesicles (LUVs):** EYPC (15 mg, 20  $\mu\text{mol}$ ) in  $\text{CHCl}_3$  (0.15 mL) was diluted with  $\text{CHCl}_3$  (5.0 mL), the solution was evaporated under reduced pressure, and the resulting thin film was dried under high vacuum for 3 h. The lipid film was hydrated with HEPES buffer solution (1.5 mL, HEPES (10 mM), KCl (100 mM), pH = 7.2) containing HPTS (0.1 mM) at 40  $^\circ\text{C}$  for 2 h to give a milky suspension. The resulting suspension was subjected to ten freeze-thaw cycles by using liquid  $\text{N}_2$  to freeze and warm water bath to thaw. The suspension was dialyzed with membrane tube (MWCO = 14000) against the same HEPES buffer solution (200 mL, without HPTS) for six times to remove un-entrapped HPTS and produce vesicle suspension ( $[\text{lipid}] = 13.3 \text{ mM}$ ).

**Fluorescent experiments:** HEPES buffer solution (2.0 mL, HEPES (10 mM), KCl (100 mM), pH = 6.0) and the prepared vesicle suspension (13.3 mM, 100  $\mu\text{L}$ ) were placed in a fluorimetric cuvette. To the cuvette, the solution of compound **2**, **3b** or **3c** in DMSO (5  $\mu\text{L}$ ) was added to reach a required channel concentration (molar ratio relative to lipid, represented by  $x$ ) with gentle stirring. Fluorescent intensity ( $I_t$ ) was continuously monitored at 510 nm (excitation at 460 nm) in 10 min. Then, Triton aqueous solution (50%, 10  $\mu\text{L}$ ) was added with gentle stirring. The intensity was monitored until the fluorescent intensity ( $I_\infty$ ) did not change. The collected data were then normalized into the fractional change in fluorescence given by  $(I_t - I_0)/(I_\infty - I_0)$ , where  $I_0$  is the initial intensity.

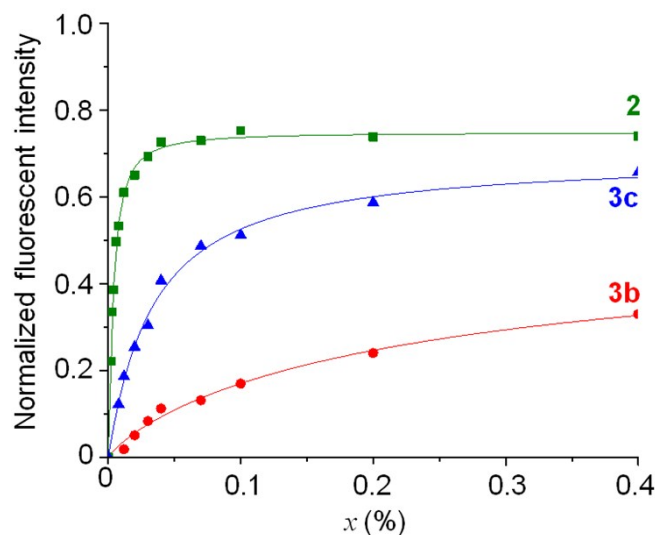

**Figure S21.** Changes in normalized fluorescent intensity of HPTS ( $\lambda_{\text{ex}} = 460 \text{ nm}$ ,  $\lambda_{\text{em}} = 510 \text{ nm}$ ) in vesicles with the concentration of **2**, **3b** and **3c** (molar ratio relative to lipid, represented by  $x$ ). By fitting the plot with Hill equation, the effective concentration needed for 50% activity ( $\text{EC}_{50}$ ) for **2**, **3b** and **3c** was determined to be 0.0037%, 0.248%, 0.033%, respectively.

#### 4. Procedures for chloride transport experiments:<sup>3</sup>

**Preparation of LG containing large unilamellar vesicles (LUVs):** EYPC (15 mg, 20  $\mu\text{mol}$ ) in  $\text{CHCl}_3$  (0.15 mL) was diluted with  $\text{CHCl}_3$  (5.0 mL), the solution was evaporated under reduced pressure, and the resulting thin film was dried under high vacuum for 3 h. The lipid film was hydrated with Mes buffer solution (1.5 mL, Mes (10 mM),  $\text{K}_2\text{SO}_4$  (71 mM), KOH, pH = 6.2) containing lucigenin (LG, 2 mM) at 40  $^\circ\text{C}$  for 2 h to give a milky suspension. The resulting suspension was subjected to ten freeze-thaw cycles by using liquid  $\text{N}_2$  to freeze and warm water bath to thaw. The suspension was dialyzed with membrane tube (MWCO = 14000) against the same Mes buffer solution (200 mL, without LG) for six times to remove un-entrapped LG and produce vesicle suspension ( $[\text{lipid}] = 13.3 \text{ mM}$ ).

**Fluorescent experiments:** Mes buffer solution (2.0 mL, Mes (10 mM),  $\text{K}_2\text{SO}_4$  (71 mM), KOH, pH = 6.2), the prepared vesicle suspension (13.3 mM, 100  $\mu\text{L}$ ) and KCl solution (60  $\mu\text{L}$ , 3.2M) were placed in a fluorimetric cuvette. To the cuvette, the solution of compound **2**, **3b** or **3c** in DMF (5  $\mu\text{L}$ ) was added to reach a required channel concentration (molar ratio relative to lipid, represented by  $x$ ) with gentle stirring. Fluorescent intensity ( $I_t$ ) was continuously monitored at 503 nm (excitation at 372 nm) in 10 min. Then, Triton aqueous solution (50%, 10  $\mu\text{L}$ ) was added with gentle stirring. The intensity was monitored until the fluorescent intensity ( $I_\infty$ ) did not change. The collected data were then normalized into the fractional change in fluorescence given by  $(I_t - I_0)/(I_\infty - I_0)$ , where  $I_0$  is the initial intensity.

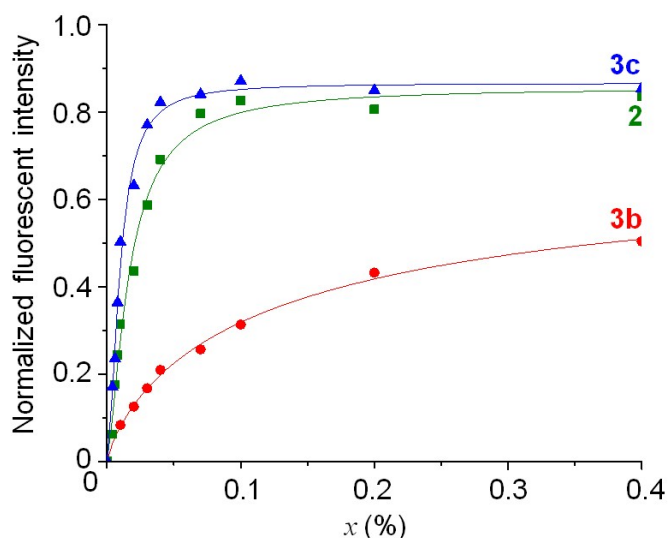

**Figure S22.** Changes in normalized fluorescent intensity of LG ( $\lambda_{\text{ex}} = 372 \text{ nm}$ ,  $\lambda_{\text{em}} = 503 \text{ nm}$ ) in vesicles with the concentration of **2**, **3b** and **3c** (molar ratio relative to lipid, represented by  $x$ ). By fitting the plot with Hill equation, the effective concentration needed for 50% activity ( $\text{EC}_{50}$ ) for **2**, **3b** and **3c** was determined to be 0.016%, 0.134%, 0.0095%, respectively.

## 5. Procedures for patch clamp experiments:<sup>4</sup>

The solution of diPhyPC in chloroform (10 mg/ml, 20  $\mu$ L) was evaporated with nitrogen gas to form a thin film and re-dissolved in *n*-decane (5  $\mu$ L). The lipid solution (0.5  $\mu$ L) was injected on to the aperture (diameter = 200  $\mu$ m) of the Delrin® cup (Warner Instruments, Hamden, CT) and then evaporated with nitrogen gas. In a typical experiment for measurement of the channel conductance for an ion, the chamber (*cis* side) and the Delrin cup (*trans* side) were filled with aqueous MCl solution (1.0 M, 1.0 mL, M = Cs<sup>+</sup>, Rb<sup>+</sup>, K<sup>+</sup> or Na<sup>+</sup>). Ag-AgCl electrodes were applied directly to the two solutions and the *cis* one was grounded. Planar lipid bilayer was formed by painting the lipids solution (1.0  $\mu$ L) around the pretreated aperture and by judgment of capacitance (80-120 pF). Membrane currents were measured using a Warner BC-535D bilayer clamp amplifier and were collected by PatchMaster (HEKA) with sample interval at 5 kHz and then filtered with a 8-pole Bessel filter at 1 kHz (HEKA). The data were analyzed by FitMaster (HEKA) with a digital filter at 100 Hz.

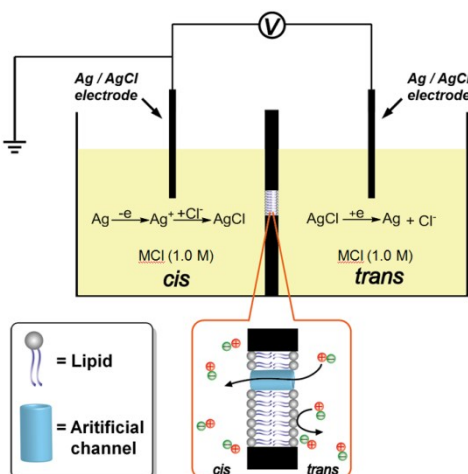

**Figure S23.** Schematic representation for the patch clamp experiments with planar lipid bilayer. The redox reactions on both Ag/AgCl electrodes are inserted to illustrate the nature of charge balance during M<sup>+</sup> transmembrane transport.

For the single-channel conductance measurement, two chambers were charged with KCl (1 M, 1 mL). And the solution of compound **2**, **3b** or **3c** in DMSO (1 mM, 0.5  $\mu$ L) was added to the *cis* compartment and the solution was stirred for 5 min.

For the measurement of the transport selectivity of M<sup>+</sup> (M = Cs<sup>+</sup>, Rb<sup>+</sup>, K<sup>+</sup> or Na<sup>+</sup>) over K<sup>+</sup>, the *cis* chamber was charged with MCl (1.0 M) and the *trans* one was charged with KCl (1.0 M). The solution of compound **3b** or **3c** in DMSO (1 mM, 0.5  $\mu$ L) was added to the *cis* compartment and the solution was stirred for 5 min.

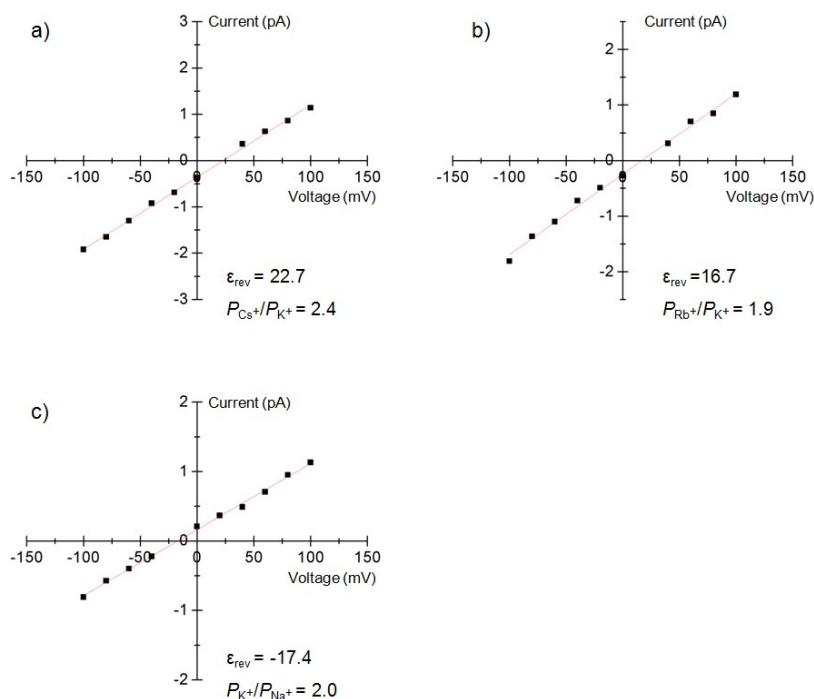

**Figure S24.** Current–voltage relationship of channel **3b** by using unsymmetrical solution at both side of the bilayer. *trans* chamber: KCl (1.0 M), *cis* chamber: (a) CsCl (1.0 M), (b) RbCl (1.0 M), (c) NaCl (1.0 M).

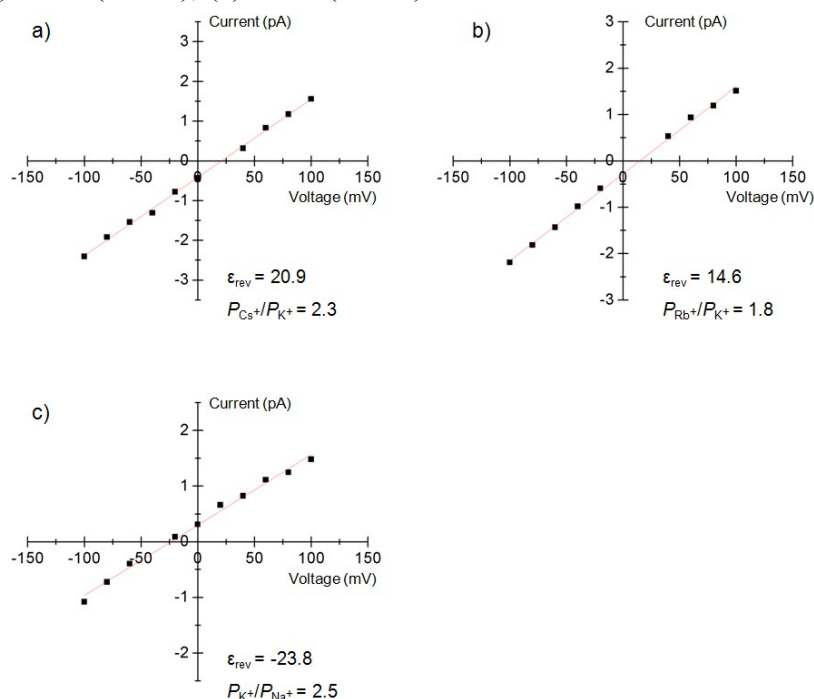

**Figure S25.** Current–voltage relationship of channel **3c** by using unsymmetrical solution at both side of the bilayer. *trans* chamber: KCl (1.0 M), *cis* chamber: (a) CsCl (1.0 M), (b) RbCl (1.0 M), (c) NaCl (1.0 M).

For the measurement of the transport selectivity of  $K^+$  over  $Cl^-$ , the KCl solutions (0.3M and 1M) were adjusted to pH 4.0, 7.0, or 10.0 by using HCl or KOH. Then, the

KCl solutions were added to the both side of the bilayer (diPhyPC), *trans* chamber: KCl (1.0 M), *cis* chamber: KCl (0.3 M). The solution of compound **2**, **3b** or **3c** in DMSO (1 mM, 0.5  $\mu$ L) was added to the *cis* compartment and the solution was stirred for 5 min.

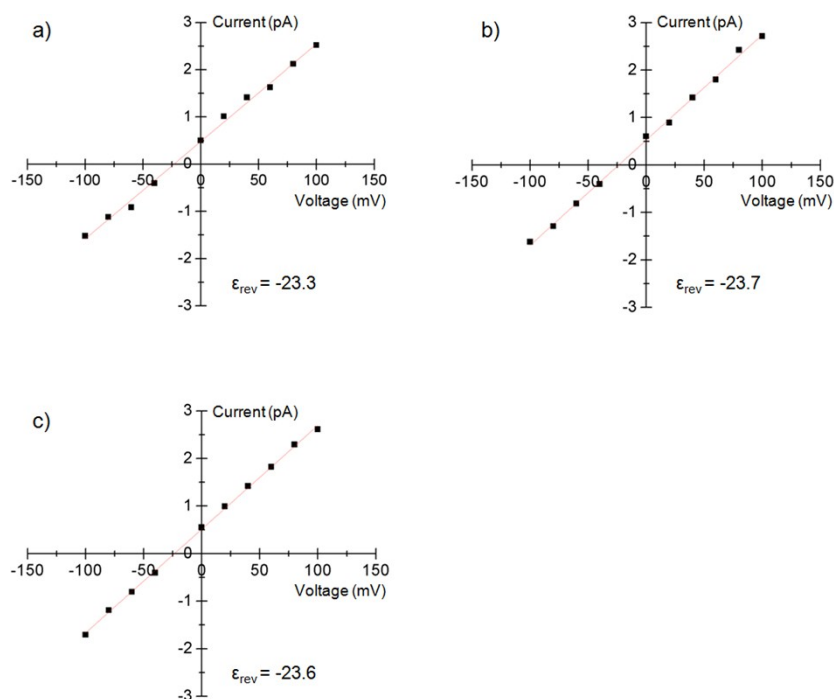

**Figure S26.** Current–voltage relationship of channel **2** by using unsymmetrical solution at both side of the bilayer. *trans* chamber: KCl (1.0 M), *cis* chamber: KCl (0.3 M). (a) pH = 4.0; (b) pH = 7.0; (c) pH = 10.0.

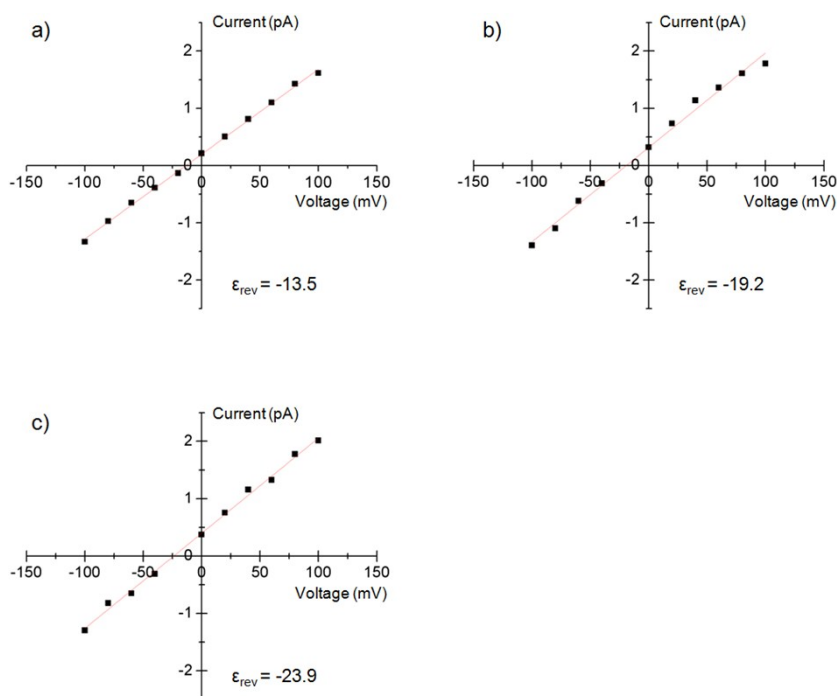

**Figure S27.** Current–voltage relationship of channel **3b** by using unsymmetrical

solution at both side of the bilayer. *trans* chamber: KCl (1.0 M), *cis* chamber: KCl (0.3 M). (a) pH = 4.0; (b) pH = 7.0; (c) pH = 10.0.

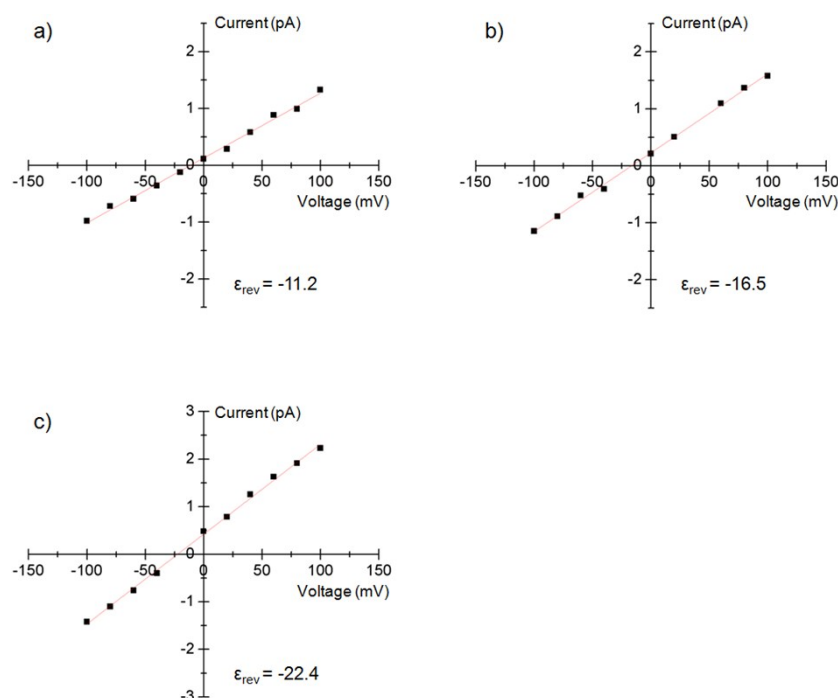

**Figure S28.** Current–voltage relationship of channel **3c** by using unsymmetrical solution at both side of the bilayer. *trans* chamber: KCl (1.0 M), *cis* chamber: KCl (0.3 M). (a) pH = 4.0; (b) pH = 7.0; (c) pH = 10.0.

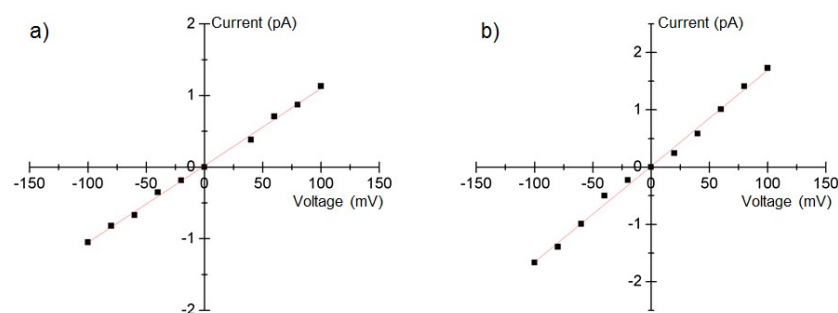

**Figure S29.**  $I$ – $V$  plots of channel **3c** by using symmetrical KCl solution at both (1.0 M) side of the bilayer. (a) pH = 4.0,  $\gamma = 10.8 \pm 0.2$  pS; (b) pH = 10.0,  $\gamma = 16.7 \pm 0.4$  pS.

## 6. References:

- 1 P. Xin, P. Zhu, P. Su, J.-L. Hou and Z.-T. Li, *J. Am. Chem. Soc.*, 2014, **136**, 13078.
- 2 X.-B. Hu, Z. Chen, G. Tang, J.-L. Hou, Z.-T. Li, *J. Am. Chem. Soc.* 2012, **134**, 8384.
- 3 B. A. McNally, A. V. Koulov, B. D. Smith, J.-B. Joos and A. P. Davis, *Chem.*

*Commun.*, 2005, 1087.

- 4 R. H. Ashley, *Ion Channels: A Practical Approach*, Oxford University Press, Oxford, 1995.
